# Supplementary material for: Two types of North American droughts related to different atmospheric circulation patterns
Source: Copernicus journal article supplement (doi:10.5194/cp-2019-22), 2019-03-04
Supplement: Supplementary file 1 [file cp-2019-22-supplement.pdf]

# Supplementary Material

## Figures

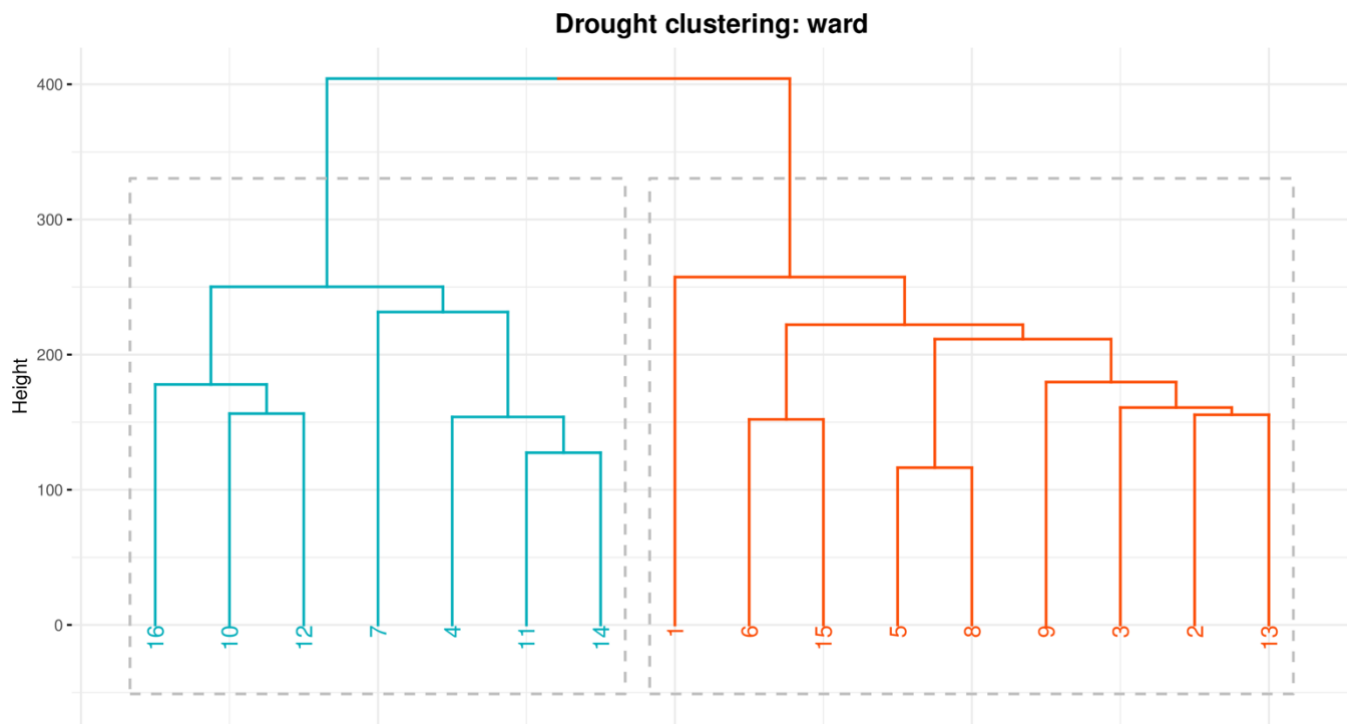

5 **Supplementary Figure S1: First two principal components of the hierarchical clustering based on the ward method of PDSI values for the 16 drought periods.**

### Drought clustering: combined approach kmeans & ward

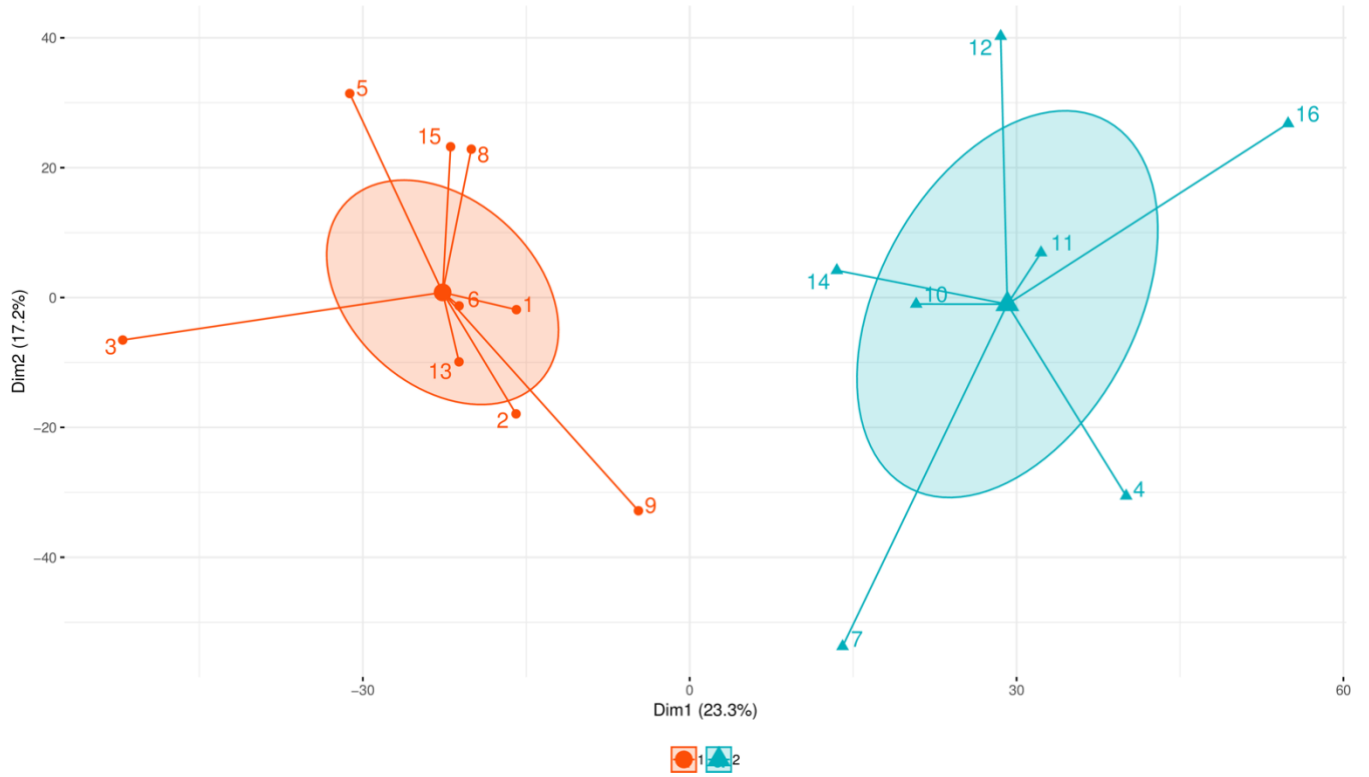

**Supplementary Figure S2: First two principal components of PDSI values for the 16 drought periods based on the k-means clustering approach with prescribed cluster centers (defined by the previous experiment with the ward method).**

## Table

**Supplementary Table S1: Comparison of our clustering approach with the droughts found by Fye et al. (2003). “Dust Bowl”-type droughts are marked with dark shading, 1950s-type droughts with light shading. Overlapping droughts were attributed to each other.**

| Fye et al. (2003)      | Our study | N drought years | Cluster |
|------------------------|-----------|-----------------|---------|
| 1946-1958              | 1952-1965 | 14              | 2       |
| 1929-1940              | 1931-1939 | 9               | 1       |
| 1897-1904 <sup>+</sup> |           |                 |         |
|                        | 1892-1896 | 5               | 2       |
| 1870-1883              | 1869-1874 | 6               | 1       |
| 1855-1865              | 1855-1866 | 12              | 2       |
| 1841-1848              |           |                 |         |
| 1818-1824              | 1817-1824 | 8               | 2       |
| 1805-1814              |           |                 |         |
|                        | 1783-1791 | 9               | 2       |
| 1772-1782              | 1772-1776 | 5               | 1       |
| 1752-1760*             | 1753-1758 | 6               | 1       |
| 1752-1757*             |           |                 |         |
| 1728-1744              | 1734-1743 | 10              | 2       |
|                        | 1716-1720 | 5               | 1       |
| 1703-1712              | 1703-1710 | 8               | 1       |
| 1663-1672              | 1663-1671 | 9               | 2       |
|                        | 1652-1656 | 5               | 1       |
|                        | 1644-1648 | 5               | 1       |
| 1626-1634*             | 1624-1634 | 11              | 1       |
| 1622-1628*             |           |                 |         |

5 <sup>+</sup> Given the 5-yr moving average used in the definition, these droughts might be considered the same.

\* These two droughts overlap in Fye et al. (2003).
